# Supplementary material for: The stability of aerobic granular sludge under low energy consumption: optimization of the granular size distribution by a novel internal component
Source: Royal Society of Chemistry journal article supplement (doi:10.1039/d1ew00060h), 2021-01-01
Supplement: d1ew00060h1.pdf [file d1ew00060h1.pdf]

# Supplementary information

For

**Supplementary material for stability of aerobic granular sludge  
under low energy consumption: Optimization of granular size  
distribution by a novel internal component**

Runjuan Cao<sup>a</sup>, Yatong Ji<sup>a</sup>, Taixing Han<sup>a</sup>, Jingsong Deng<sup>a</sup>, Liang Zhu<sup>a,b,c</sup>, Xiangyang  
Xu<sup>a,b,c,\*</sup>

<sup>a</sup> College of environmental and resources sciences, Zhejiang University, Hangzhou,  
310058, China

<sup>b</sup> Zhejiang Province Key Laboratory for Water Pollution Control and Environmental  
Safety, Hangzhou 310058, China

<sup>c</sup> Zhejiang Provincial Engineering Laboratory of Water Pollution Control, 388  
Yuhangtang Road, Hangzhou, 310058, China

\* Corresponding author

Address: Department of Environmental Engineering, Zhejiang University, No. 866  
Yuhangtang Road, Hangzhou 310058, China

Tel.: +86 571 88982343; Fax: +86 571 88982343

E-mail address: xuxy@zju.edu.cn

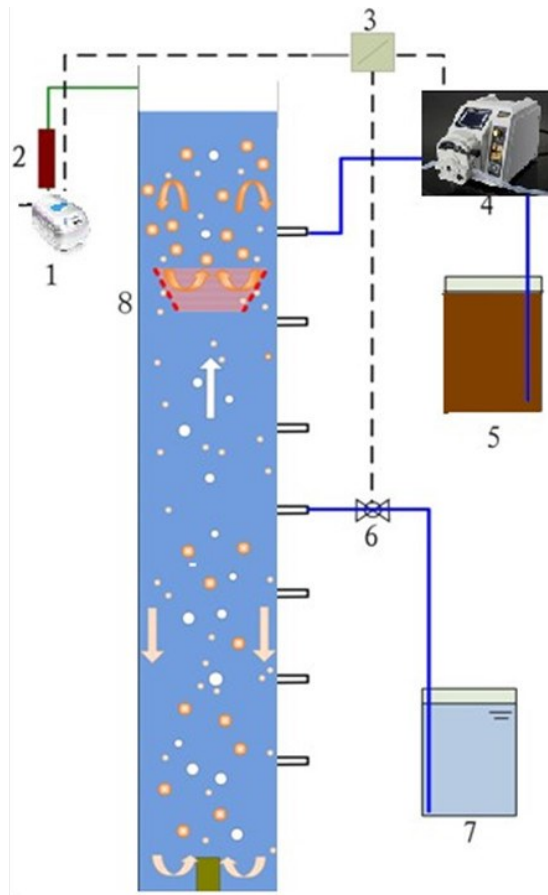

**Fig. S1 Schematic of novel bioreactor with built-in screens of different pore sizes  
(R1 is control reactor, R2, R3, R4 with pore sizes of 1.5, 2.5, 3.5 mm)**

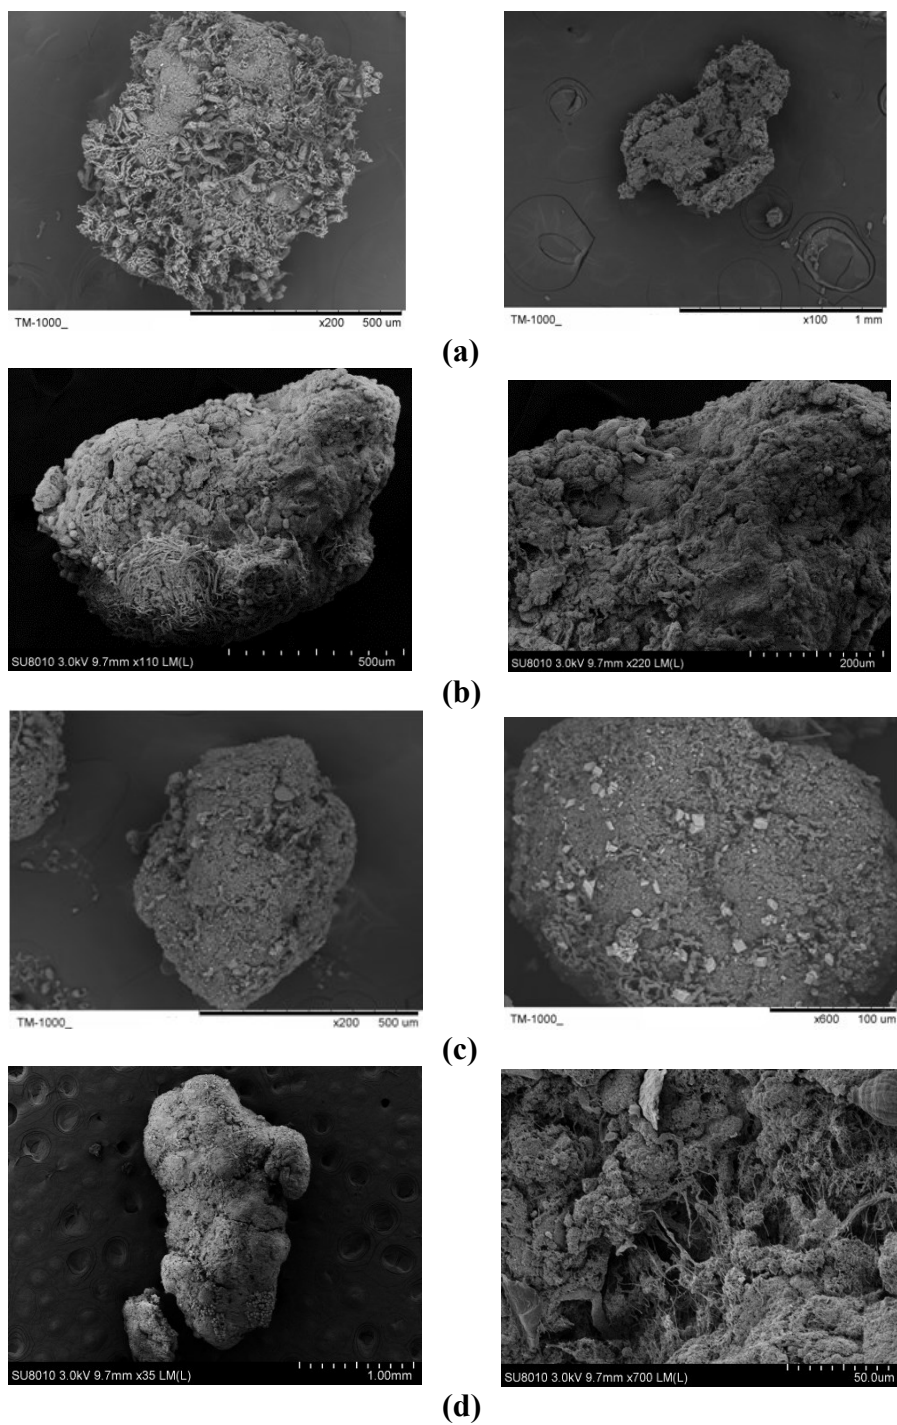

**Fig. S2 SEM images of aerobic granules in four reactors at 35d: a. R1; b. R2; c. R3; d. R4**

**Table. S1 Variation of microbial aroma index of sludge in different reactors**

| Time<br>(d) | R1   | R2   | R3   | R4   |
|-------------|------|------|------|------|
| 0           | 4.26 | 4.26 | 4.26 | 4.26 |
| 20          | 5.13 | 5.09 | 5.31 | 5.48 |
| 40          | 5.64 | 6.23 | 6.44 | 4.91 |
| 60          | 5.37 | 6.73 | 6.91 | 3.66 |
